# Supplementary material
Source: Springer Nature journal article supplement (https://www.springermedizin.de/resource/supplementary/12888_2012_1250_MOESM4_ESM.pdf/9480790)

**Temperature****Activity****Light****Control**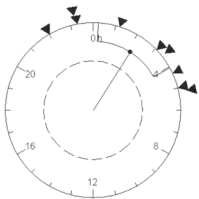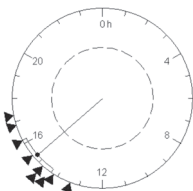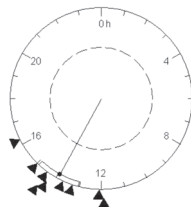**Dfe**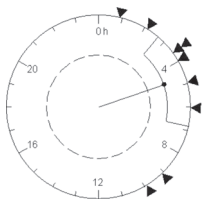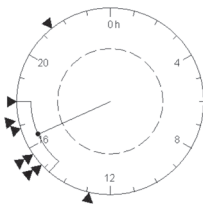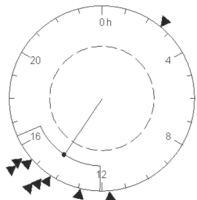**Dc**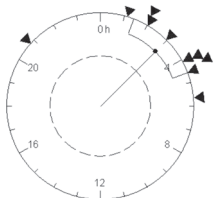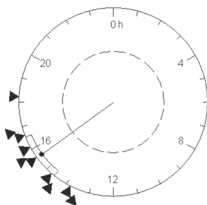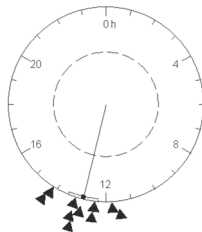

Supplement: MOESM4 [file 9480790]
